# Supplementary material for: Donor–acceptor–donor thienyl/bithienyl-benzothiadiazole/quinoxaline model oligomers: experimental and theoretical studies
Source: Royal Society of Chemistry journal article supplement (doi:10.1039/c3cp52056k), 2013-01-01
Supplement: c3cp52056k.pdf [file c3cp52056k.pdf]

## Supporting Information

# Donor-Acceptor-Donor Thienyl/Bithienyl- Benzothiadiazole/Quinoxaline Model Oligomers: Experimental and Theoretical studies

João Pina<sup>a)\*</sup>, J. Seixas de Melo<sup>a)\*</sup>, D. Breusov<sup>b)</sup>, Ulli Scherf<sup>b)</sup>

<sup>a</sup> *Department of Chemistry, University of Coimbra, Rua Larga, 3004-535 Coimbra, Portugal.*

<sup>b</sup> *Bergische Universität Wuppertal, Makromolekulare Chemie, Gaußstr. 20, 42097 Wuppertal, Germany.*

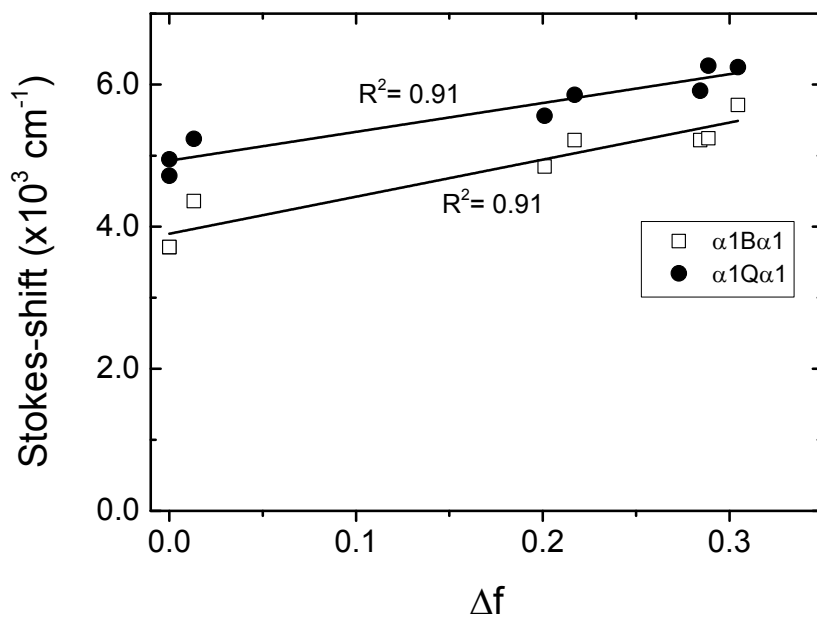

Figure S1- The lines represent a fit of the data according to the Lippert–Mataga relationship (see equation 2 in the manuscript and associated text) by using a linear regression fit.
